# Supplementary material
Source: ML conference proceedings conference paper supplement (https://openreview.net/forum?id=l5N0P1UJKP)
Supplement: supplementary_material [file paper appendix.pdf › paper appendix.pdf]

# Appendix: Hybrid Autoencoders for Tabular Data: Leveraging Model-Based Augmentation in Low-Label Settings

Extending the spectral analysis in the main paper (Section 6), we present additional visualizations across more datasets to further examine how the gating mechanisms in TANDEM shape the frequency content of the input. For each dataset, we focus on a single class and compute the unnormalized discrete Fourier transform (NUDFT) over the 50 most variant features. We compare the spectra of the original input  $x$ ; the neural-gated input  $\hat{x}^{\text{NN}} = x \odot g^{\text{NN}}(x)$ , as produced by both TANDEM and SS-AE with gating; and the tree-gated input  $\hat{x}^{\text{OSDT}} = x \odot \bar{g}^{\text{OSDT}}(x)$ , where  $\bar{g}^{\text{OSDT}}$  is the average gating mask across all trees and depths.

These extended plots confirm the patterns observed in the main paper: namely, that neural gating acts as a strong low-pass filter, suppressing high-frequency components, while tree-based gating preserves more high-frequency variation, which reinforces their complementary inductive biases in shaping representations.

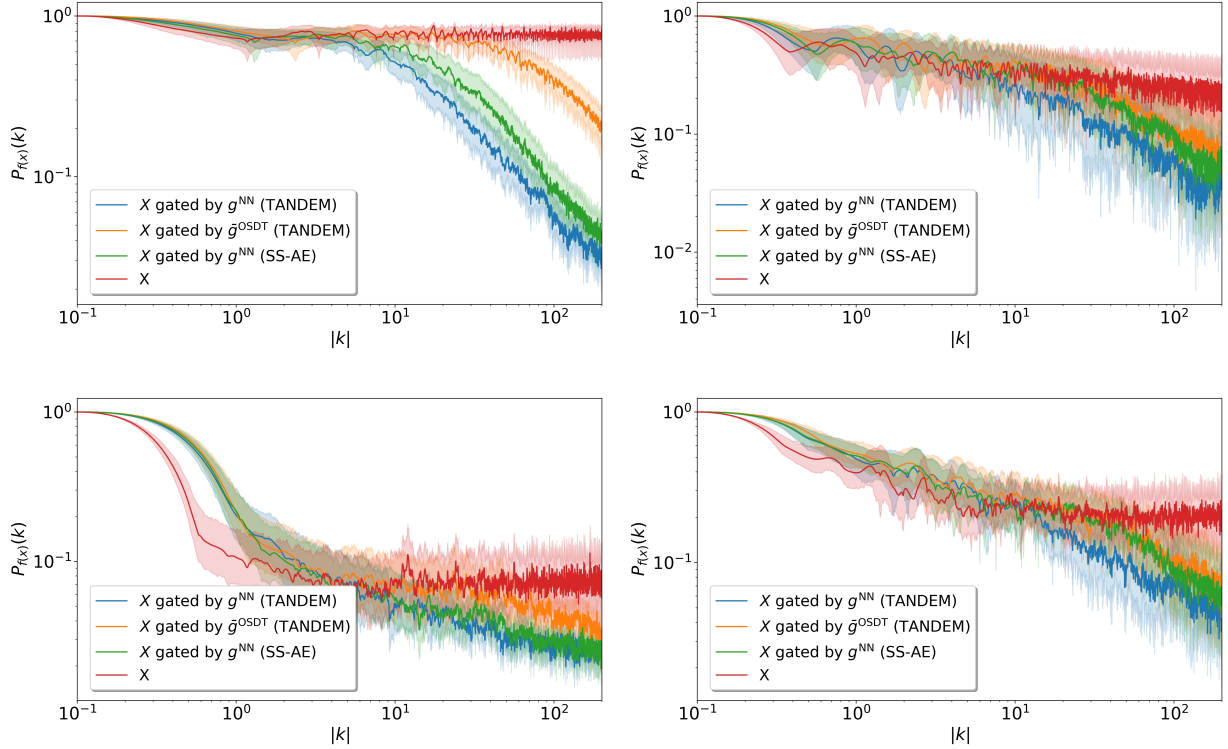

Figure 1: Frequency spectra of gated inputs for the NN and OSDT encoders. Visualized datasets include OG, CP, VO, and CC. NN gating results in stronger suppression of high-frequency components compared to tree-based gating.

## A Comparative Performance and Ablation Analysis

This section presents the same tables shown in the main paper, with added standard deviation error bars.

| Dataset       | LogReg                                | DeepTLF             | TabM                                  | TabPFN                                | XGBoost             | CatBoost            | MLP                                   | SS AE                                 | TANDEM                                |
|---------------|---------------------------------------|---------------------|---------------------------------------|---------------------------------------|---------------------|---------------------|---------------------------------------|---------------------------------------|---------------------------------------|
| CP            | 0.4927 $\pm$ 0.0138                   | 0.5438 $\pm$ 0.0390 | 0.5827 $\pm$ 0.0283                   | 0.5998 $\pm$ 0.0294                   | 0.5822 $\pm$ 0.0298 | 0.5401 $\pm$ 0.0114 | 0.5792 $\pm$ 0.0291                   | 0.6505 $\pm$ 0.0303                   | <b>0.6779 <math>\pm</math> 0.0325</b> |
| MT            | 0.7521 $\pm$ 0.0252                   | 0.6757 $\pm$ 0.0529 | 0.7720 $\pm$ 0.0252                   | 0.8139 $\pm$ 0.0216                   | 0.7868 $\pm$ 0.0215 | 0.7929 $\pm$ 0.0166 | 0.7798 $\pm$ 0.0213                   | 0.7996 $\pm$ 0.0255                   | <b>0.8180 <math>\pm</math> 0.0228</b> |
| OG            | 0.6228 $\pm$ 0.0134                   | 0.3712 $\pm$ 0.1913 | 0.6228 $\pm$ 0.0132                   | 0.6514 $\pm$ 0.0125                   | 0.6136 $\pm$ 0.0115 | 0.6363 $\pm$ 0.0116 | 0.6321 $\pm$ 0.0125                   | 0.6500 $\pm$ 0.0118                   | <b>0.6870 <math>\pm</math> 0.0123</b> |
| PW            | 0.9373 $\pm$ 0.0315                   | 0.9281 $\pm$ 0.0161 | 0.9384 $\pm$ 0.0152                   | 0.9477 $\pm$ 0.0136                   | 0.9353 $\pm$ 0.0137 | 0.9327 $\pm$ 0.0296 | 0.9315 $\pm$ 0.0152                   | 0.9353 $\pm$ 0.0173                   | <b>0.9618 <math>\pm</math> 0.0143</b> |
| AD            | 0.7992 $\pm$ 0.0221                   | 0.7645 $\pm$ 0.0544 | 0.8115 $\pm$ 0.0207                   | 0.8199 $\pm$ 0.0200                   | 0.7875 $\pm$ 0.0216 | 0.8019 $\pm$ 0.0177 | 0.8006 $\pm$ 0.0260                   | <b>0.8202 <math>\pm</math> 0.0220</b> | 0.8200 $\pm$ 0.0217                   |
| ALB           | 0.6065 $\pm$ 0.0265                   | 0.5512 $\pm$ 0.0349 | 0.6196 $\pm$ 0.0228                   | 0.6494 $\pm$ 0.0324                   | 0.6096 $\pm$ 0.0234 | 0.6354 $\pm$ 0.0248 | 0.5929 $\pm$ 0.0347                   | 0.6497 $\pm$ 0.0322                   | <b>0.7038 <math>\pm</math> 0.0283</b> |
| BM            | <b>0.8325 <math>\pm</math> 0.0155</b> | 0.6306 $\pm$ 0.1093 | 0.8132 $\pm$ 0.0292                   | 0.8241 $\pm$ 0.0287                   | 0.7991 $\pm$ 0.0300 | 0.8171 $\pm$ 0.0246 | 0.7913 $\pm$ 0.0301                   | 0.8141 $\pm$ 0.0218                   | 0.8233 $\pm$ 0.0178                   |
| CO            | 0.4624 $\pm$ 0.0086                   | 0.4881 $\pm$ 0.0250 | 0.5049 $\pm$ 0.0172                   | 0.5485 $\pm$ 0.0160                   | 0.5326 $\pm$ 0.0167 | 0.4975 $\pm$ 0.0111 | 0.4963 $\pm$ 0.0143                   | 0.5007 $\pm$ 0.0154                   | <b>0.5491 <math>\pm</math> 0.0150</b> |
| CC            | 0.6169 $\pm$ 0.0249                   | 0.6302 $\pm$ 0.0370 | 0.6218 $\pm$ 0.0394                   | 0.6451 $\pm$ 0.0374                   | 0.6780 $\pm$ 0.0362 | 0.6690 $\pm$ 0.0240 | <b>0.7190 <math>\pm</math> 0.0358</b> | 0.6833 $\pm$ 0.0248                   | 0.7331 $\pm$ 0.0251                   |
| EL            | 0.6617 $\pm$ 0.0313                   | 0.6424 $\pm$ 0.0274 | 0.6610 $\pm$ 0.0315                   | <b>0.7723 <math>\pm</math> 0.0279</b> | 0.7668 $\pm$ 0.0292 | 0.7654 $\pm$ 0.0249 | 0.7525 $\pm$ 0.0296                   | 0.7429 $\pm$ 0.0309                   | 0.6940 $\pm$ 0.0240                   |
| HE            | 0.4593 $\pm$ 0.0119                   | —                   | —                                     | —                                     | 0.4590 $\pm$ 0.0173 | 0.4853 $\pm$ 0.0111 | 0.4448 $\pm$ 0.0184                   | 0.5250 $\pm$ 0.0132                   | <b>0.5462 <math>\pm</math> 0.0140</b> |
| HI            | 0.5454 $\pm$ 0.0257                   | 0.4965 $\pm$ 0.0284 | 0.5532 $\pm$ 0.0259                   | <b>0.6499 <math>\pm</math> 0.0248</b> | 0.6096 $\pm$ 0.0266 | 0.6069 $\pm$ 0.0309 | 0.6035 $\pm$ 0.0254                   | 0.6179 $\pm$ 0.0326                   | 0.6459 $\pm$ 0.0333                   |
| JA            | 0.5105 $\pm$ 0.0166                   | 0.4649 $\pm$ 0.0292 | 0.5743 $\pm$ 0.0248                   | <b>0.5986 <math>\pm</math> 0.0254</b> | 0.5409 $\pm$ 0.0262 | 0.5413 $\pm$ 0.0159 | 0.5417 $\pm$ 0.0249                   | 0.5168 $\pm$ 0.0195                   | 0.5660 $\pm$ 0.0212                   |
| NU            | 0.4833 $\pm$ 0.0221                   | 0.4932 $\pm$ 0.0153 | 0.5221 $\pm$ 0.0144                   | 0.4333 $\pm$ 0.0170                   | 0.5308 $\pm$ 0.0141 | 0.5231 $\pm$ 0.0177 | 0.5517 $\pm$ 0.0151                   | 0.6092 $\pm$ 0.0320                   | <b>0.6545 <math>\pm</math> 0.0355</b> |
| RS            | 0.6992 $\pm$ 0.0186                   | 0.6590 $\pm$ 0.0308 | <b>0.7886 <math>\pm</math> 0.0272</b> | 0.7554 $\pm$ 0.0283                   | 0.7057 $\pm$ 0.0289 | 0.7328 $\pm$ 0.0169 | 0.7243 $\pm$ 0.0273                   | 0.7016 $\pm$ 0.0253                   | 0.7576 $\pm$ 0.0289                   |
| VO            | 0.4624 $\pm$ 0.0086                   | 0.3966 $\pm$ 0.0340 | 0.4790 $\pm$ 0.0306                   | 0.5082 $\pm$ 0.0313                   | 0.4736 $\pm$ 0.0304 | 0.4975 $\pm$ 0.0111 | <b>0.5400 <math>\pm</math> 0.0298</b> | 0.5154 $\pm$ 0.0128                   | 0.5220 $\pm$ 0.0138                   |
| Mean Accuracy | 0.6257                                | 0.5824              | 0.6577                                | 0.6812                                | 0.6507              | 0.6612              | 0.6551                                | 0.6708                                | <b>0.6975</b>                         |
| Mean Rank     | 6.94                                  | 8.53                | 5.13                                  | 2.93                                  | 5.38                | 4.81                | 5.31                                  | 3.63                                  | <b>1.81</b>                           |

Table A.1: Accuracy results for 8 baseline models and TANDEM, across 19 datasets. Bold indicates the best result per dataset.

| Dataset       | SS AE + Gating                        | OSDT AE + Gating                      | TANDEM (no gate)                      | TANDEM (no LRS + Alignment) | TANDEM                                |
|---------------|---------------------------------------|---------------------------------------|---------------------------------------|-----------------------------|---------------------------------------|
| CP            | 0.6602 $\pm$ 0.0318                   | 0.6321 $\pm$ 0.0303                   | 0.6740 $\pm$ 0.0324                   | 0.6740 $\pm$ 0.0324         | <b>0.6779 <math>\pm</math> 0.0325</b> |
| MT            | 0.8096 $\pm$ 0.0255                   | 0.7639 $\pm$ 0.0240                   | 0.8117 $\pm$ 0.0214                   | 0.8014 $\pm$ 0.0206         | <b>0.8180 <math>\pm</math> 0.0228</b> |
| OG            | 0.6740 $\pm$ 0.0120                   | 0.6601 $\pm$ 0.0356                   | 0.6659 $\pm$ 0.0152                   | 0.6671 $\pm$ 0.0132         | <b>0.6870 <math>\pm</math> 0.0123</b> |
| PW            | 0.9353 $\pm$ 0.0181                   | 0.8259 $\pm$ 0.0310                   | 0.9464 $\pm$ 0.0129                   | 0.9485 $\pm$ 0.0141         | <b>0.9618 <math>\pm</math> 0.0143</b> |
| AD            | 0.8085 $\pm$ 0.0232                   | 0.7688 $\pm$ 0.0585                   | 0.8111 $\pm$ 0.0223                   | 0.7990 $\pm$ 0.0216         | <b>0.8200 <math>\pm</math> 0.0217</b> |
| ALB           | 0.6797 $\pm$ 0.0320                   | 0.6652 $\pm$ 0.0284                   | 0.6763 $\pm$ 0.0284                   | 0.6800 $\pm$ 0.0277         | <b>0.7038 <math>\pm</math> 0.0283</b> |
| BM            | 0.8141 $\pm$ 0.0237                   | 0.7552 $\pm$ 0.0199                   | 0.8138 $\pm$ 0.0214                   | 0.8059 $\pm$ 0.0231         | <b>0.8233 <math>\pm</math> 0.0178</b> |
| CO            | 0.5207 $\pm$ 0.0170                   | 0.5373 $\pm$ 0.0499                   | 0.5220 $\pm$ 0.0148                   | 0.5164 $\pm$ 0.0163         | <b>0.5491 <math>\pm</math> 0.0150</b> |
| CC            | 0.6900 $\pm$ 0.0284                   | 0.6892 $\pm$ 0.0523                   | <b>0.7434 <math>\pm</math> 0.0254</b> | 0.7188 $\pm$ 0.0265         | 0.7331 $\pm$ 0.0251                   |
| EL            | <b>0.7429 <math>\pm</math> 0.0332</b> | 0.6149 $\pm$ 0.0444                   | 0.7134 $\pm$ 0.0252                   | 0.7001 $\pm$ 0.0276         | 0.6940 $\pm$ 0.0240                   |
| HE            | 0.5350 $\pm$ 0.0136                   | 0.4416 $\pm$ 0.0656                   | 0.5315 $\pm$ 0.0139                   | 0.5193 $\pm$ 0.0142         | <b>0.5462 <math>\pm</math> 0.0140</b> |
| HI            | 0.6279 $\pm$ 0.0330                   | <b>0.6621 <math>\pm</math> 0.0528</b> | 0.6300 $\pm$ 0.0299                   | 0.6350 $\pm$ 0.0274         | 0.6459 $\pm$ 0.0333                   |
| JA            | 0.5468 $\pm$ 0.0234                   | 0.5012 $\pm$ 0.0465                   | 0.5529 $\pm$ 0.0175                   | 0.5541 $\pm$ 0.0204         | <b>0.5660 <math>\pm</math> 0.0212</b> |
| NU            | 0.6092 $\pm$ 0.0342                   | 0.6140 $\pm$ 0.0393                   | 0.6325 $\pm$ 0.0318                   | 0.6377 $\pm$ 0.0307         | <b>0.6545 <math>\pm</math> 0.0355</b> |
| RS            | 0.7016 $\pm$ 0.0260                   | 0.7252 $\pm$ 0.0274                   | 0.7311 $\pm$ 0.0252                   | 0.7335 $\pm$ 0.0270         | <b>0.7576 <math>\pm</math> 0.0289</b> |
| VO            | <b>0.5254 <math>\pm</math> 0.0142</b> | 0.4334 $\pm$ 0.0231                   | 0.4741 $\pm$ 0.0126                   | 0.4983 $\pm$ 0.0140         | 0.5220 $\pm$ 0.0138                   |
| Mean Accuracy | 0.6801                                | 0.6431                                | 0.6831                                | 0.6768                      | <b>0.6975</b>                         |
| Mean Rank     | 2.75                                  | 3.56                                  | 2.38                                  | 2.88                        | <b>1.31</b>                           |

Table A.2: Accuracy results for TANDEM with encoder and gating variants across 19 datasets. Bold indicates the best result per dataset.

*Dolan–Moré curves:* Figure 4 in the main paper presents Dolan–Moré performance profiles, which show the proportion of datasets where each model achieves performance within a factor  $\tau$  of the best-performing model. Unlike rank-based comparisons, these curves capture both accuracy and robustness, providing a more complete view of model consistency across diverse tasks. Higher curves indicate models that maintain strong performance across a larger share of datasets, even if not ranked first.

## B Dataset Details

Table B.1 provides an overview of the datasets used in our experiments, including the number of samples, input features, and target classes. This supplements the dataset summary introduced in Section 5.1 of the main paper.

| Dataset (Acronym)                                | #Samples (N) | #Features (F) | #Classes (C) |
|--------------------------------------------------|--------------|---------------|--------------|
| Click_prediction_small (CP)                      | 9200         | 27            | 2            |
| MagicTelescope (MT)                              | 19020        | 11            | 2            |
| Otto-Group-Product-Classification-Challenge (OG) | 16400        | 93            | 5            |
| PhishingWebsites (PW)                            | 9200         | 30            | 2            |
| adult (AD)                                       | 9200         | 14            | 2            |
| albert_categorical (ALB)                         | 9200         | 25            | 2            |
| bank-marketing (BM)                              | 45200        | 16            | 2            |
| covertime (CO)                                   | 283300       | 54            | 6            |
| default-of-credit-card-clients_categorical (CC)  | 5200         | 23            | 2            |
| electricity (EL)                                 | 19240        | 11            | 2            |
| helen (HE)                                       | 36260        | 27            | 13           |
| higgs (HI)                                       | 470080       | 28            | 2            |
| jannis (JA)                                      | 83600        | 54            | 4            |
| numera128.6 (NU)                                 | 9200         | 119           | 2            |
| road-safety_categorical (RS)                     | 363240       | 67            | 2            |
| volkret (VO)                                     | 14800        | 181           | 8            |
| pol (PO)                                         | 15000        | 48            | 2            |
| california (CA)                                  | 20634        | 8             | 2            |
| eye_movements (EM)                               | 10935        | 27            | 3            |

Table B.1: Dataset statistics: number of samples (N), features (F), and target classes (C).

## C Experimental Setup

We follow the training and evaluation protocol described in Section 5.2 of the main paper. All experiments use 2,000 unlabeled and 400 labeled examples per class, with 100 pretraining epochs and batch size 128. During supervised training, encoders were frozen for the first 25 epochs and then fine-tuned for an additional 25 epochs. Gating modules were frozen throughout.

All experiments were conducted on a local machine equipped with an Intel i7 CPU, 16GB RAM, and an NVIDIA RTX 3060 GPU (12GB).

## D Model Architectures and Training

This section outlines the architectural components used in our experiments, following the design described in Sections 4.1 and 4.3 of the main paper. The final embedding dimensionality is determined by the depth parameter  $L$  of the OSDT encoder, which was selected separately for each dataset based on validation performance.

- **Neural Encoder:** 4-layer MLP with BatchNorm and Leaky ReLU activations. Hidden dimensions are chosen to match the embedding size dictated by the OSDT encoder.
- **OSDT Encoder:** Ensemble of oblivious soft decision trees with fixed depth  $L$ ; each tree outputs a soft assignment over  $2^L$  leaves. The mean-aggregated output defines the embedding dimension.
- **Neural Decoder:** Mirrors the architecture and dimensionality of the neural encoder.
- **Gating Network:** 2-layer MLP with tanh activation and hard-sigmoid output; used for per-sample feature selection.
- **Fine-tuning MLP:** A single-layer fully connected classifier trained on top of the encoder for downstream supervised evaluation.

## E Hyperparameter Tuning

Table E.1 summarizes the hyperparameter search space used in Optuna-based tuning (50 trials per model, per dataset). This supports the configuration described in Section 5.2 of the main paper. Gating components, when applicable, were tuned separately.

Table E.1: Hyperparameter search space for all models. Each model was optimized using Optuna with 50 trials. Gating components (when applicable) were tuned separately.

| Model                      | Hyperparameter Search Space                                                                                                                                                                                                              | Notes                                                             |
|----------------------------|------------------------------------------------------------------------------------------------------------------------------------------------------------------------------------------------------------------------------------------|-------------------------------------------------------------------|
| <b>TabNet</b>              | learning rate: $[10^{-4}, 10^{-1}]$<br>mask type: {sparsemax, entmax}<br>scheduler step size: [5–20], gamma: [0.8–0.95]<br>batch size: {512, 1024, 2048}<br>virtual batch size: {64, 128, 256}<br>max epochs: [10–100], patience: [5–20] | Pretrained with TabNetPretrainer before supervised fine-tuning    |
| <b>MLP</b>                 | learning rate: $[10^{-4}, 10^{-2}]$ (log scale)<br>hidden sizes: [64–256]<br>batch size: {32, 64, 128}<br>epochs: [10–50]                                                                                                                | 4-layer MLP with ReLU activations                                 |
| <b>XGBoost</b>             | max depth: [3–10]<br>gamma: $[10^{-8}, 1]$<br>subsample, colsample bytree: [0.5, 1.0]<br>reg alpha, reg lambda: $[10^{-8}, 10]$                                                                                                          | <code>use_label_encoder=False</code>                              |
| <b>CatBoost</b>            | depth: [2–10]<br>learning rate: $[10^{-3}, 0.3]$<br>iterations: [100–300]                                                                                                                                                                | <code>verbose=0</code>                                            |
| <b>Logistic Regression</b> | $C$ : $[10^{-4}, 10]$ (log-uniform)                                                                                                                                                                                                      | <code>max_iter=5000</code>                                        |
| <b>DeepTFL</b>             | n estimators: [10–100]<br>max depth: [2–7]<br>dropout: [0.0–0.3]<br>n layers: [1–3]                                                                                                                                                      | Internal tree-based layers                                        |
| <b>TabM</b>                | n blocks: [2–4]<br>d block: [64–256]<br>dropout: [0.0–0.3]<br>$k$ : [8–64]<br>learning rate: $[10^{-4}, 5 \times 10^{-3}]$ (log)                                                                                                         | –                                                                 |
| <b>TabPFN</b>              | n estimators: {1, 2, 4, 8}<br>softmax temperature: [0.5, 1.0]<br>balance probabilities: {True, False}<br>average before softmax: {True, False}                                                                                           | Pretrained; limited tuning allowed                                |
| <b>SS-AE</b>               | learning rate: $[10^{-4}, 10^{-2}]$<br>weight decay: $[10^{-5}, 10^{-2}]$<br>depth: [3–10]                                                                                                                                               | Encoder uses powers-of-two hidden sizes. Gating tuned separately. |
| <b>TANDEM</b>              | learning rate: $[10^{-4}, 10^{-2}]$<br>weight decay: $[10^{-5}, 10^{-2}]$<br>depth: [3–10]<br>num trees: [2–16]<br>gating optimizer, activation, learning rate                                                                           | Shared decoder. Gating network tuned separately.                  |
| <b>Gating Network</b>      | hidden size: [32–128]<br>learning rate: $[10^{-4}, 10^{-2}]$<br>weight decay: $[10^{-5}, 10^{-2}]$                                                                                                                                       | Used in SS-AE and TANDEM for per-sample masking.                  |
